# Supplementary material for: Construction of a Phylogenetic Tree of Photosynthetic Prokaryotes Based on Average Similarities of Whole Genome Sequences
Source: PubMed Central journal article supplement (PMC3724816; doi:10.1371/journal.pone.0070290), 2013-07-26

# Fig. S1

(A)  $F_{AV} = (F_{XY} + F_{YX}) / 2$

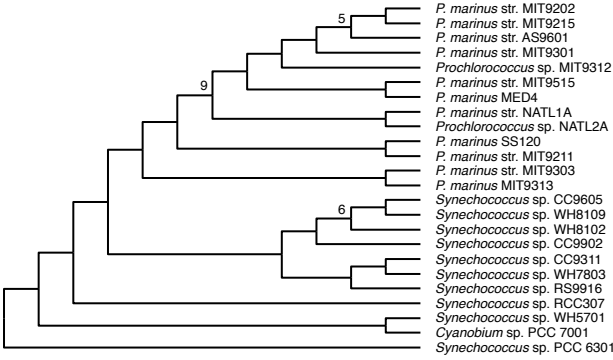

(B)  $F_{XY}$

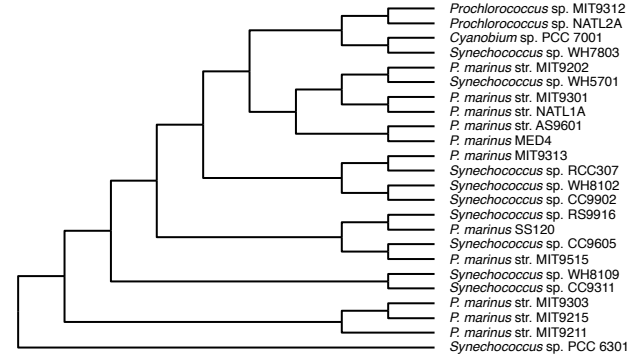

(C)  $F_{YX}$

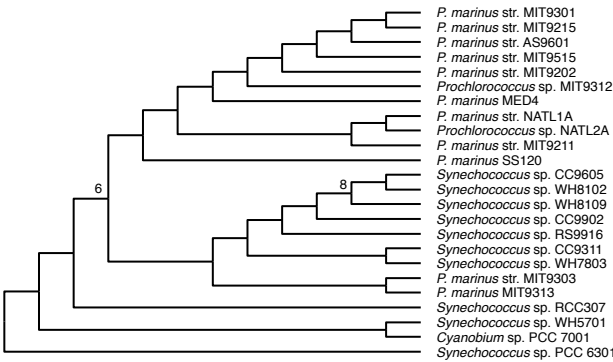

(D)  $F_H = F_{XY}$  if  $(F_{XY} > F_{YX})$   
or  $F_H = F_{YX}$  if  $(F_{YX} > F_{XY})$

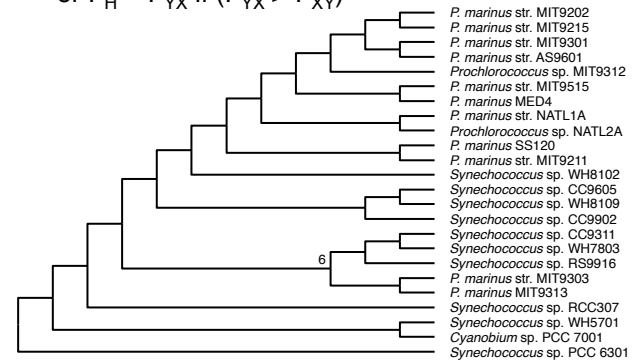

(E)  $F_L = F_{XY}$  if  $(F_{XY} < F_{YX})$   
or  $F_L = F_{YX}$  if  $(F_{YX} < F_{XY})$

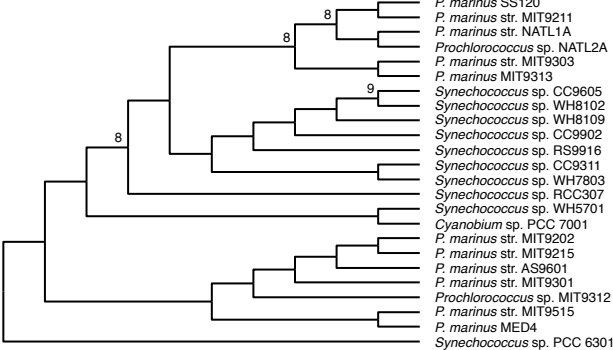

Supplement: pone.0070290.s001.pdf [file pone.0070290.s001.pdf]
