# Supplementary material for: Construction of a Phylogenetic Tree of Photosynthetic Prokaryotes Based on Average Similarities of Whole Genome Sequences
Source: PubMed Central journal article supplement (PMC3724816; doi:10.1371/journal.pone.0070290), 2013-07-26

Figure S3

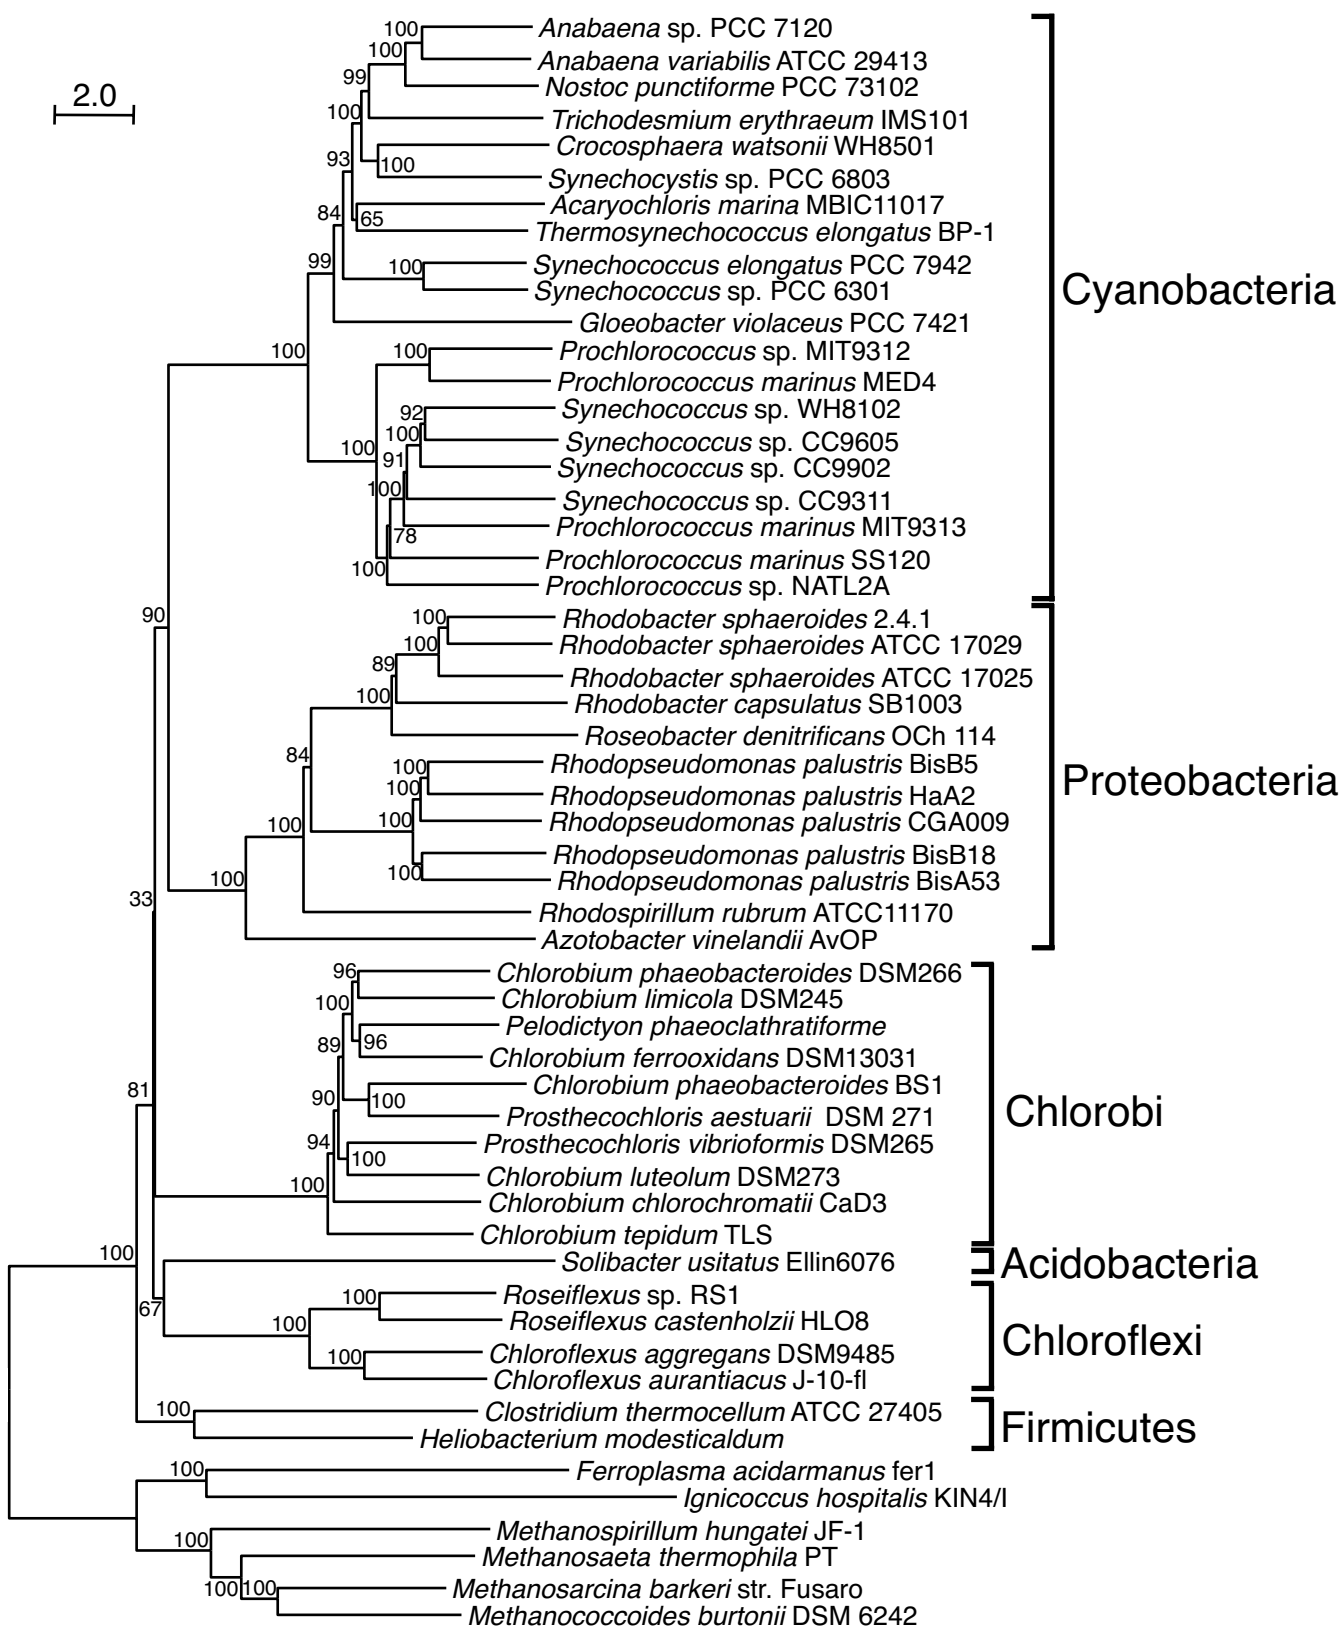

Supplement: pone.0070290.s003.pdf [file pone.0070290.s003.pdf]
