# Supplementary material for: Construction of a Phylogenetic Tree of Photosynthetic Prokaryotes Based on Average Similarities of Whole Genome Sequences
Source: PubMed Central journal article supplement (PMC3724816; doi:10.1371/journal.pone.0070290), 2013-07-26
Supplement: pone.0070290.s004.pdf [file pone.0070290.s004.pdf]

Figure S4

a) - PSI proteins

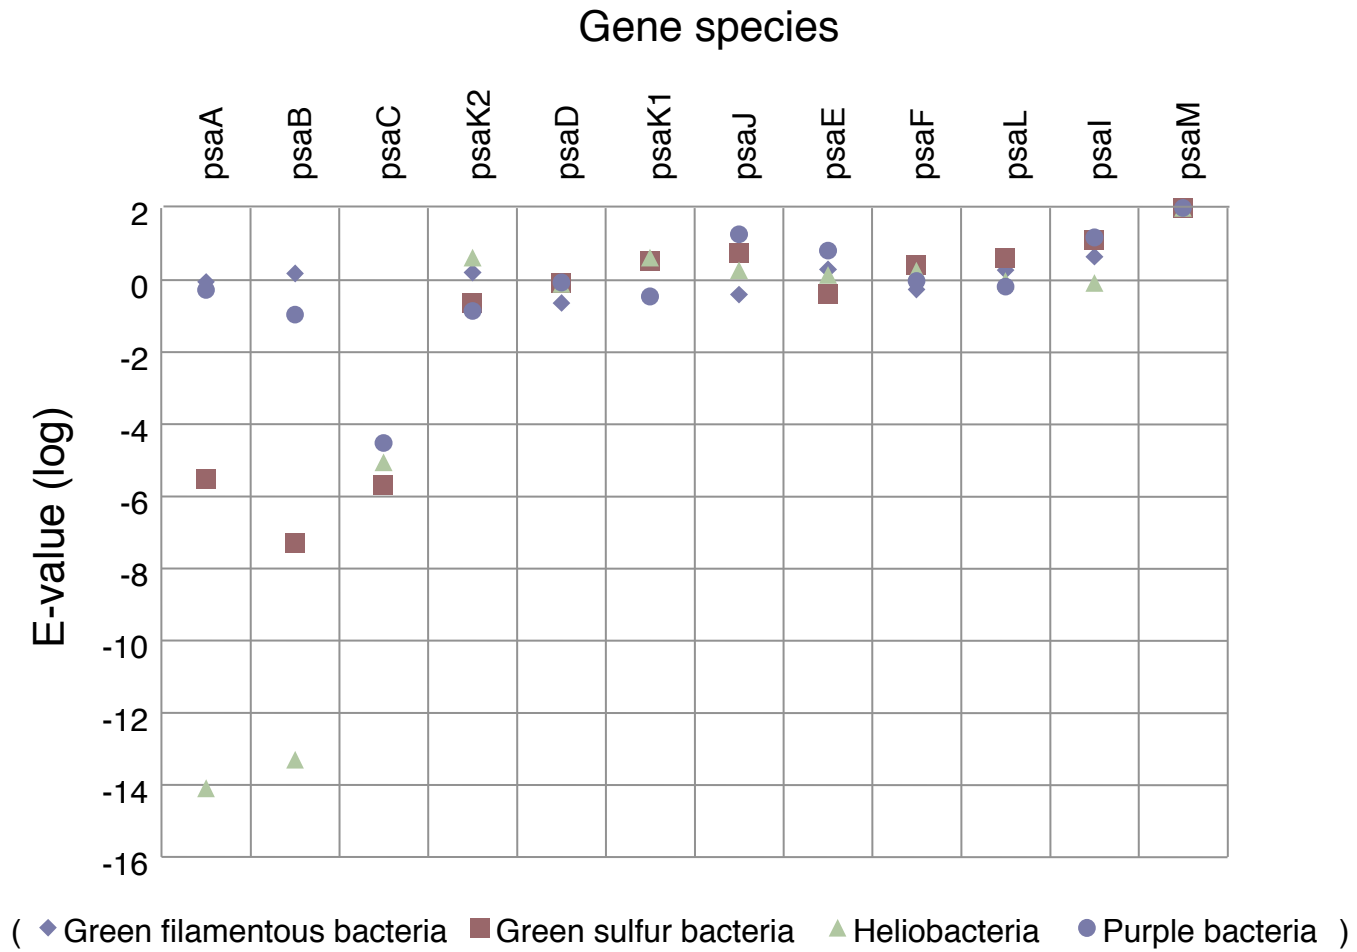

## b) - PSII proteins

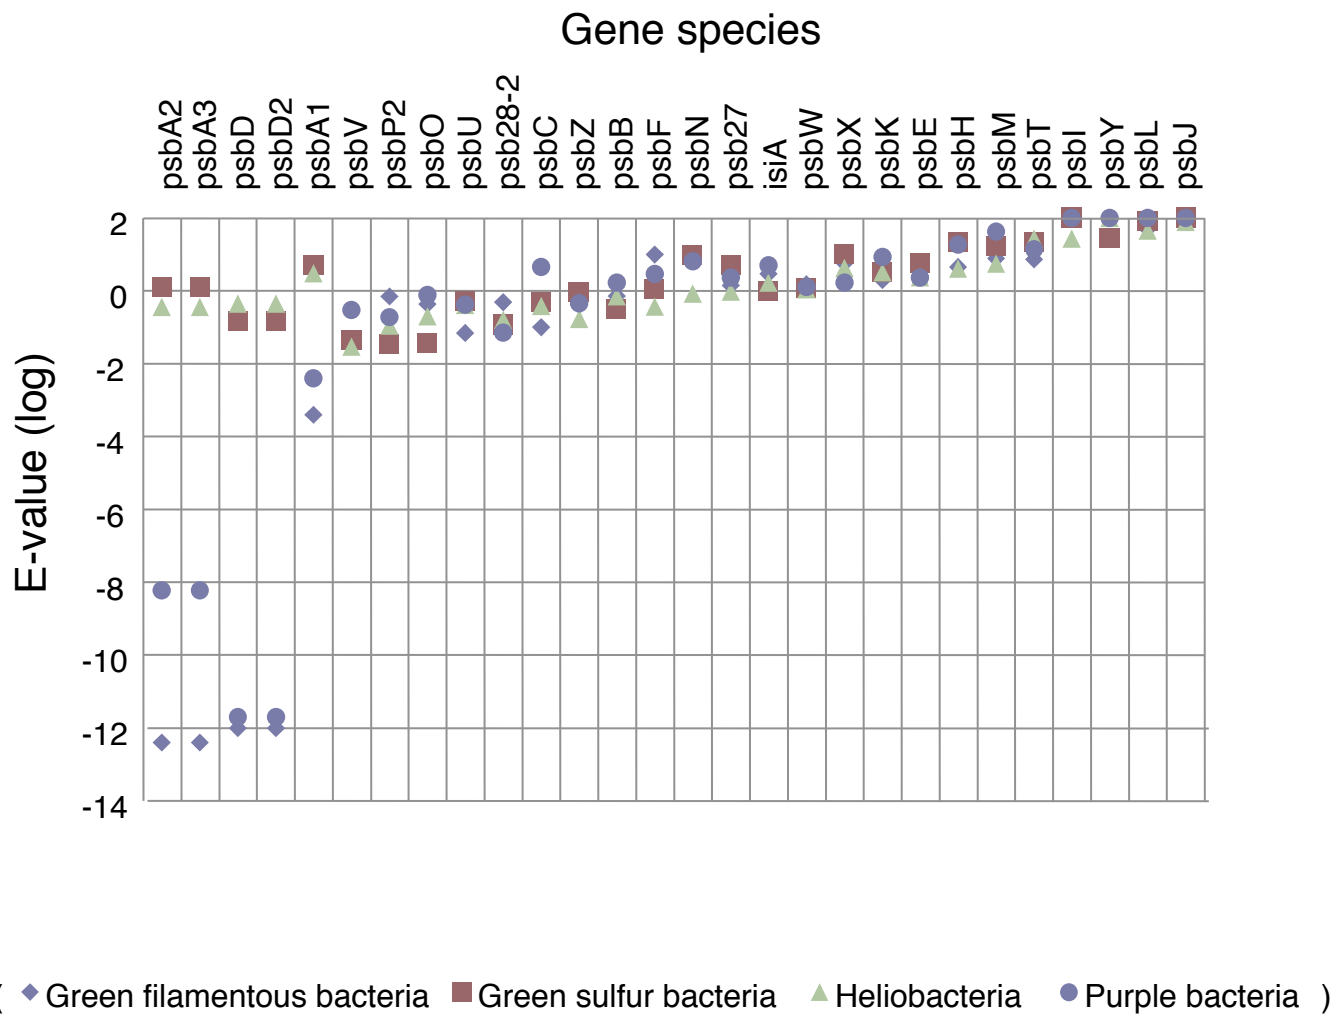

c) - Cytochrome  $b_6f$  proteins and electron carrier proteins

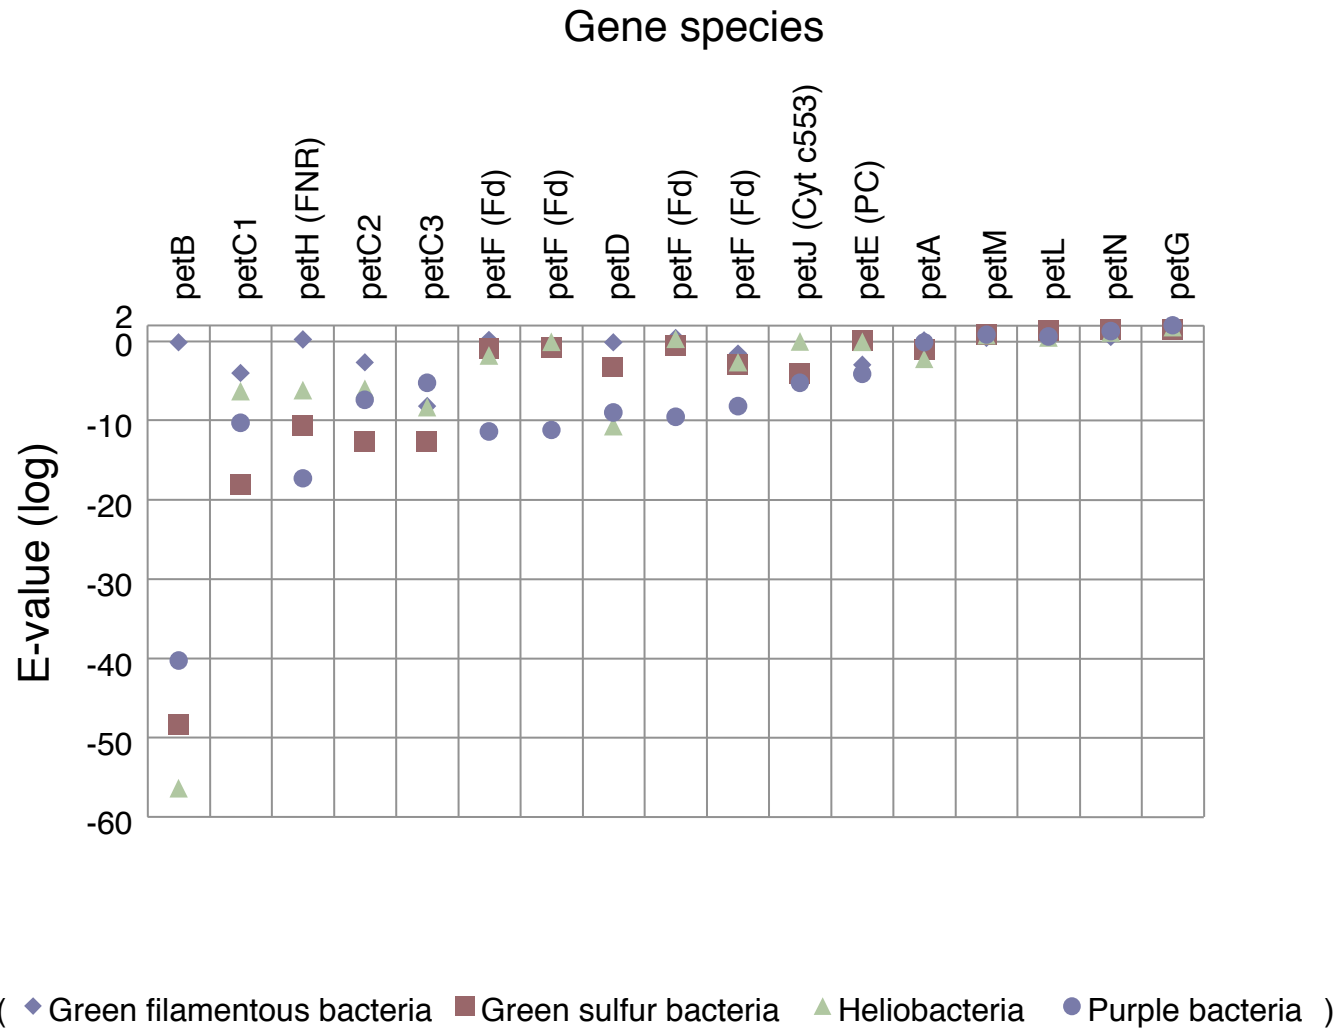

d) - Carbon concentration and assimilation

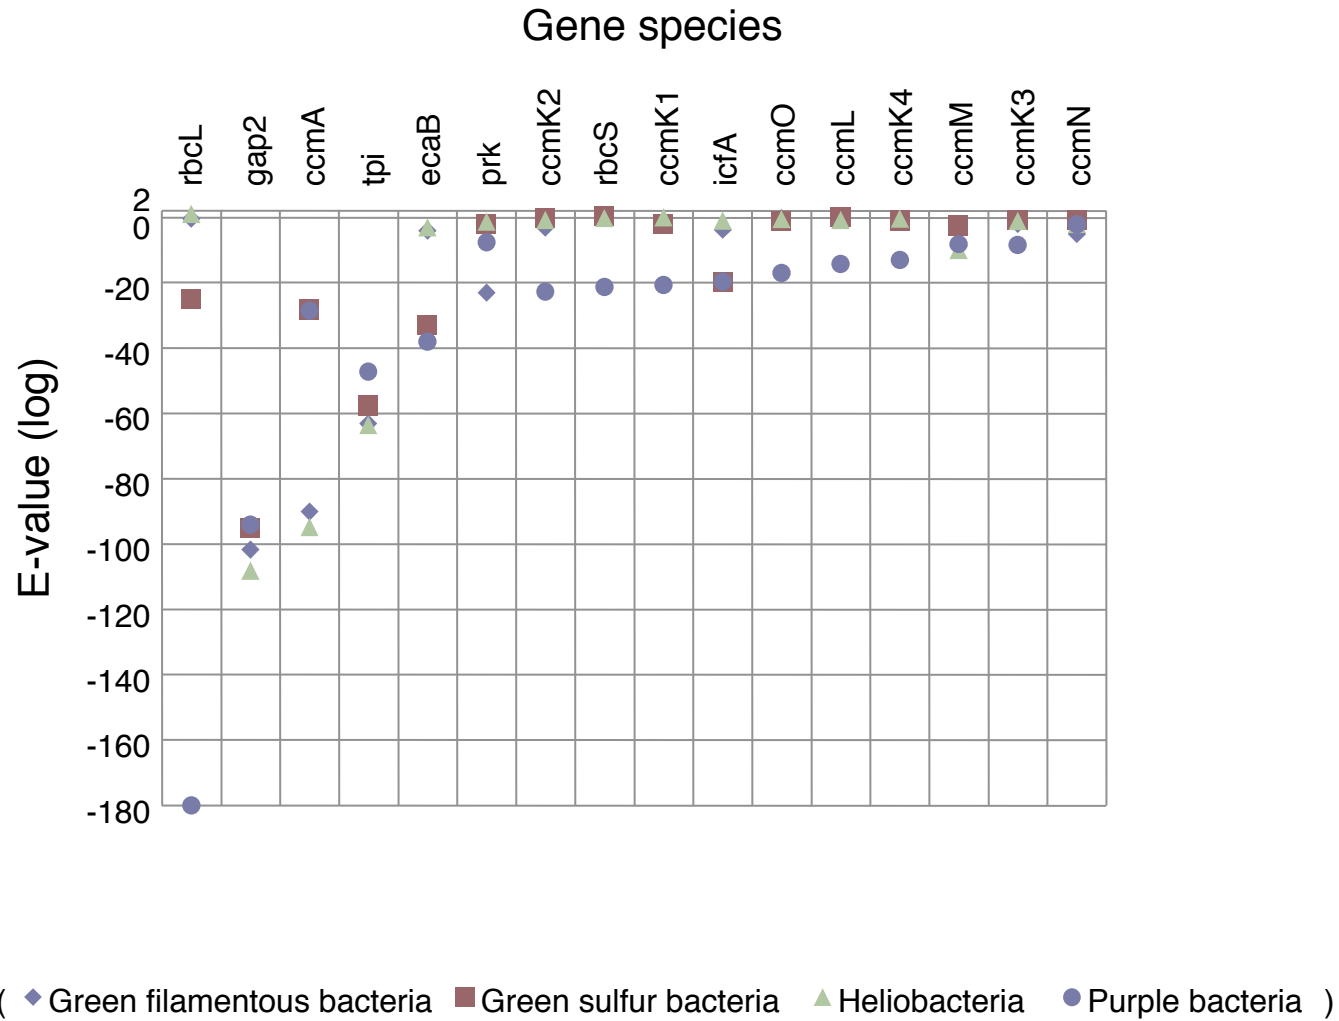

# e) - Chlorophyll biosynthesis

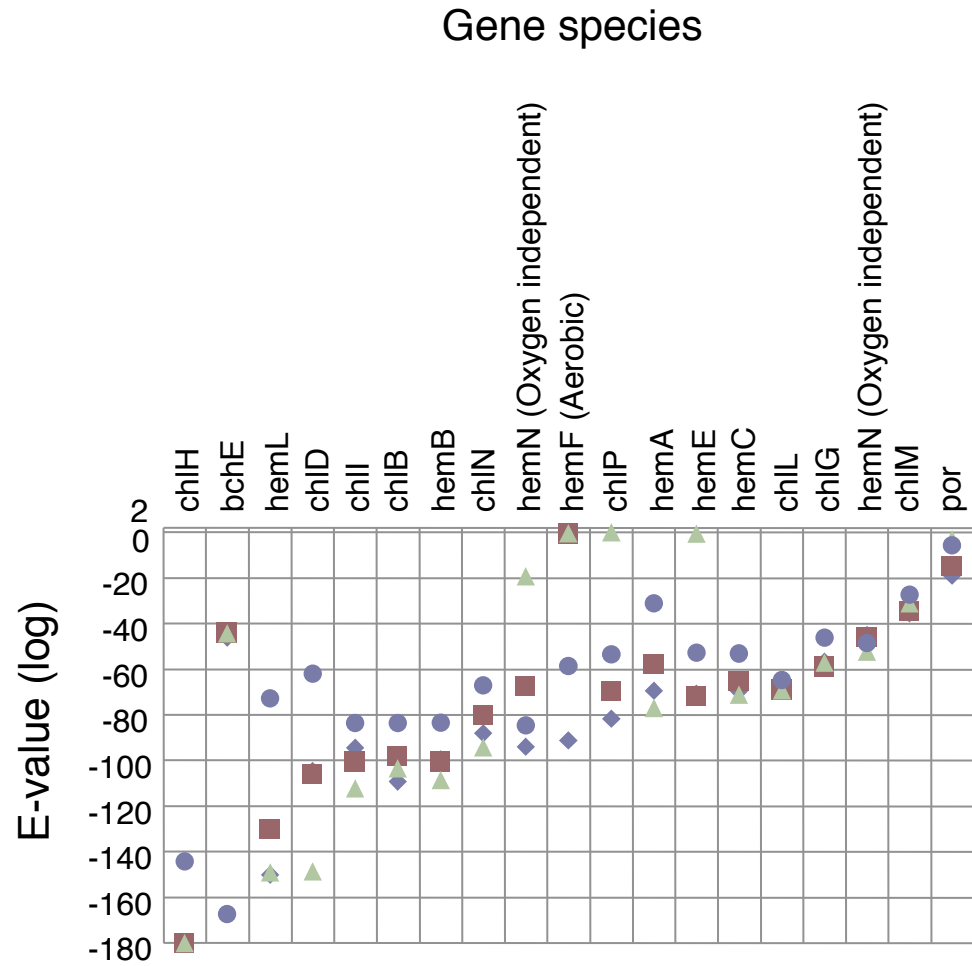

( ◆ Green filamentous bacteria   ■ Green sulfur bacteria   ▲ Heliobacteria   ● Purple bacteria )
