# Supplementary material for: Construction of a Phylogenetic Tree of Photosynthetic Prokaryotes Based on Average Similarities of Whole Genome Sequences
Source: PLoS One. 2013 Jul 26;8(7):e70290. doi: 10.1371/journal.pone.0070290 (PMC3724816; doi:10.1371/journal.pone.0070290)
Supplement: Table S2 — List of bacterial genome databases used for phylogenetic analysis. (XLS) [file pone.0070290.s006.xls]

## Sheet: S2
Table S2. List of bacterial protein sequence databases used for phylogenetic analysis.
	Bacterial group	Strain	Database
	Cyanobacteria	Acaryochloris marina MBIC11017	DDBJ/EMBL/GenBank
		Anabaena sp. PCC 7120	CyanoBase
		Anabaena variabilis ATCC 29413	JGI
		Arthrospira maxima CS-328	DDBJ/EMBL/GenBank
		Arthrospira platensis str. Paraca	DDBJ/EMBL/GenBank
		Arthrospira platensis NIES-39	DDBJ/EMBL/GenBank
		Crocosphaera watsonii WH8501	JGI
		Cyanobium sp. PCC 7001	DDBJ/EMBL/GenBank
		Cyanothece sp. ATCC 51142	DDBJ/EMBL/GenBank
		Cyanothece sp. ATCC 51472	DDBJ/EMBL/GenBank
		Cyanothece sp. CCY0110	DDBJ/EMBL/GenBank
		Cyanothece sp. PCC 7424	DDBJ/EMBL/GenBank
		Cyanothece sp. PCC 7425	DDBJ/EMBL/GenBank
		Cyanothece sp. PCC 7822	DDBJ/EMBL/GenBank
		Cyanothece sp. PCC 8801	DDBJ/EMBL/GenBank
		Cyanothece sp. PCC 8802	DDBJ/EMBL/GenBank
		Cyanobacterium UCYN-A	DDBJ/EMBL/GenBank
		Cylindrospermopsis raciborskii CS-505	DDBJ/EMBL/GenBank
		Fischerella sp. JSC-11	DDBJ/EMBL/GenBank
		Gloeobacter violaceus PCC 7421	CyanoBase
		Lyngbya sp. PCC 8106	DDBJ/EMBL/GenBank
		Microcoleus chthonoplastes PCC 7420	DDBJ/EMBL/GenBank
		Microcoleus vaginatus FGP-2	DDBJ/EMBL/GenBank
		Microcystis aeruginosa NIES-843	DDBJ/EMBL/GenBank
		Moorea producta 3L	DDBJ/EMBL/GenBank
		Nodularia spumigena CCY9414	DDBJ/EMBL/GenBank
		'Nostoc azollae' 0708	DDBJ/EMBL/GenBank
		Nostoc punctiforme PCC 73102	JGI
		Oscillatoria sp. PCC 6506	DDBJ/EMBL/GenBank
		Prochlorococcus marinus str. AS9601	DDBJ/EMBL/GenBank
		Prochlorococcus marinus MED4	JGI
		Prochlorococcus marinus str. MIT 9202	DDBJ/EMBL/GenBank
		Prochlorococcus marinus str. MIT 9211	DDBJ/EMBL/GenBank
		Prochlorococcus marinus str. MIT 9215	DDBJ/EMBL/GenBank
		Prochlorococcus marinus str. MIT 9301	DDBJ/EMBL/GenBank
		Prochlorococcus marinus str. MIT 9303	DDBJ/EMBL/GenBank
		Prochlorococcus marinus MIT9313	JGI
		Prochlorococcus marinus str. MIT 9515	DDBJ/EMBL/GenBank
		Prochlorococcus marinus str. NATL1A	DDBJ/EMBL/GenBank
		Prochlorococcus marinus SS120	Cyanorak
		Prochlorococcus sp. MIT9312	JGI
		Prochlorococcus sp. NATL2A	JGI
		Raphidiopsis brookii D9	DDBJ/EMBL/GenBank
		Synechococcus elongatus PCC 7942	JGI
		Synechococcus sp. BL107	DDBJ/EMBL/GenBank
		Synechococcus sp. CC9311	DDBJ/EMBL/GenBank
		Synechococcus sp. CC9605	JGI
		Synechococcus sp. CC9902	JGI
		Synechococcus sp. JA-2-3B'a(2-13)	DDBJ/EMBL/GenBank
		Synechococcus sp. JA-3-3Ab	DDBJ/EMBL/GenBank
		Synechococcus sp. PCC 6301	DDBJ/EMBL/GenBank
		Synechocystis sp. PCC 6803	CyanoBase
		Synechococcus sp. PCC 7002	DDBJ/EMBL/GenBank
		Synechococcus sp. PCC 7335	DDBJ/EMBL/GenBank
		Synechococcus sp. RCC307	DDBJ/EMBL/GenBank
		Synechococcus sp. RS9916	DDBJ/EMBL/GenBank
		Synechococcus sp. RS9917	DDBJ/EMBL/GenBank
		Synechococcus sp. WH 5701	DDBJ/EMBL/GenBank
		Synechococcus sp. WH 7803	DDBJ/EMBL/GenBank
		Synechococcus sp. WH 7805	DDBJ/EMBL/GenBank
		Synechococcus sp. WH8102	JGI
		Synechococcus sp. WH 8109	DDBJ/EMBL/GenBank
		Thermosynechococcus elongatus BP-1	CyanoBase
		Trichodesmium erythraeum IMS101	JGI
	Chloroflexi	Chloroflexus aggregans DSM9485	JGI
		Chloroflexus aurantiacus J-10-fl	JGI
		Herpetosiphon aurantiacus DSM 785	DDBJ/EMBL/GenBank
		Oscillochloris trichoides DG-6	DDBJ/EMBL/GenBank
		Roseiflexus castenholzii HLO8	JGI
		Roseiflexus sp. RS1	JGI
	Chorobi	Chlorobium chlorochromatii CaD3	JGI
		Chlorobium ferrooxidans DSM13031	JGI
		Chlorobium limicola DSM245	JGI
		Chlorobium luteolum DSM273	JGI
		Chlorobium phaeobacteroides BS1	JGI
		Chlorobium phaeobacteroides DSM266	JGI
		Chlorobium tepidum TLS	DDBJ/EMBL/GenBank
		Chloroherpeton thalassium ATCC 35110	NCBI
		Pelodictyon phaeoclathratiforme	JGI
		Prosthecochloris aestuarii DSM 271	JGI
		Prosthecochloris vibrioformis DSM265	JGI
	Firmicutes	Clostridium thermocellum ATCC 27405	JGI
		Heliobacterium modesticaldum	DDBJ/EMBL/GenBank
	Proteobacteria	Bradyrhizobium sp. BTAi1	DDBJ/EMBL/GenBank
		Bradyrhizobium sp. ORS 278	DDBJ/EMBL/GenBank
		Citromicrobium bathyomarinum JL354	DDBJ/EMBL/GenBank
		Dinoroseobacter shibae DFL 12	DDBJ/EMBL/GenBank
		Erythrobacter sp. NAP1	DDBJ/EMBL/GenBank
		Jannaschia sp. CCS1	DDBJ/EMBL/GenBank
		Loktanella vestfoldensis SKA 53	DDBJ/EMBL/GenBank
		Rhodobacter capsulatus SB1003	Integrated genomics Inc.
		Rhodobacter sphaeroides 2.4.1	JGI
		Rhodobacter sphaeroides ATCC 17025	JGI
		Rhodobacter sphaeroides ATCC 17029	JGI
		Rhodopseudomonas palustris BisA53	JGI
		Rhodopseudomonas palustris BisB18	JGI
		Rhodopseudomonas palustris BisB5	JGI
		Rhodopseudomonas palustris CGA009	JGI
		Rhodopseudomonas palustris HaA2	JGI
		Rhodospirillum rubrum ATCC11170	JGI
		Roseobacter denitrificans OCh 114	DDBJ/EMBL/GenBank
		Roseobacter litoralis Och 149	DDBJ/EMBL/GenBank
		Roseobacter sp. AzwK-3b	DDBJ/EMBL/GenBank
		Roseobacter sp. CCS2	DDBJ/EMBL/GenBank
		Roseovarius sp. 217	DDBJ/EMBL/GenBank
		Rubrivivax gelatinosus IL144	DDBJ/EMBL/GenBank
		Azotobacter vinelandii AvOP	JGI
		Congregibacter litoralis KT71	DDBJ/EMBL/GenBank
	Acidobacteria	Solibacter usitatus Ellin6076	JGI
	Archaea	Ferroplasma acidarmanus fer1	JGI
		Ignicoccus hospitalis KIN4/I	JGI
		Methanococcoides burtonii DSM 6242	JGI
		Methanosaeta thermophila PT	JGI
		Methanosarcina barkeri str. Fusaro	JGI
		Methanospirillum hungatei JF-1	JGI
Bacterial genome databases used for phylogenetic analysis are listed.
